# Supplementary material
Source: PubMed Central journal article supplement (PMC2459551)
Supplement: NIHMS53244-supplement-Supp_Fig_1.pdf [file NIHMS53244-supplement-Supp_Fig_1.pdf]

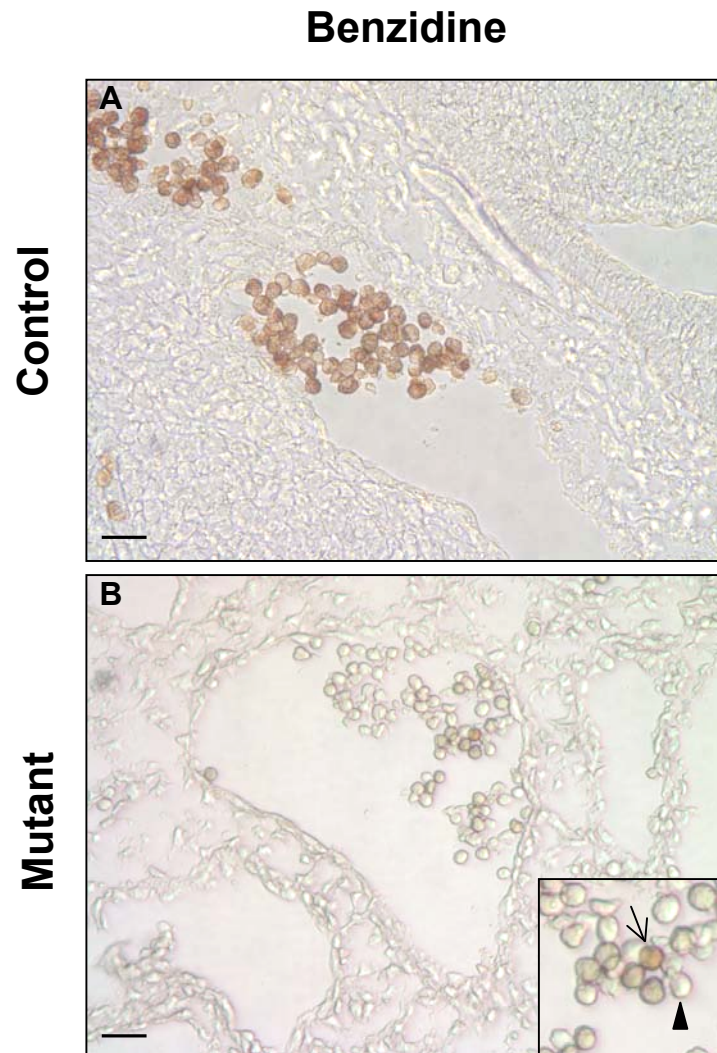

**Figure S1: Benzidine staining reveals a hemoglobin deficit in *Brg1<sup>fl/fl</sup>:Tie2-Cre<sup>+/-</sup>* primitive erythrocytes.** E9.5 control *Brg1<sup>fl/fl</sup>* embryonic (A) and mutant *Brg1<sup>fl/fl</sup>:Tie2-Cre<sup>+/-</sup>* placental (B) cryosections were stained with benzidine for detection of hemoglobin. The arrow in the inset points to an embryonic blood cell with relatively normal levels of benzidine staining while the arrowhead points to an embryonic blood cell with undetectable levels of benzidine staining. Scale bar=20 $\mu$ m.
