# Supplementary material
Source: PubMed Central journal article supplement (PMC2459551)
Supplement: NIHMS53244-supplement-Supp_Fig_2.pdf [file NIHMS53244-supplement-Supp_Fig_2.pdf]

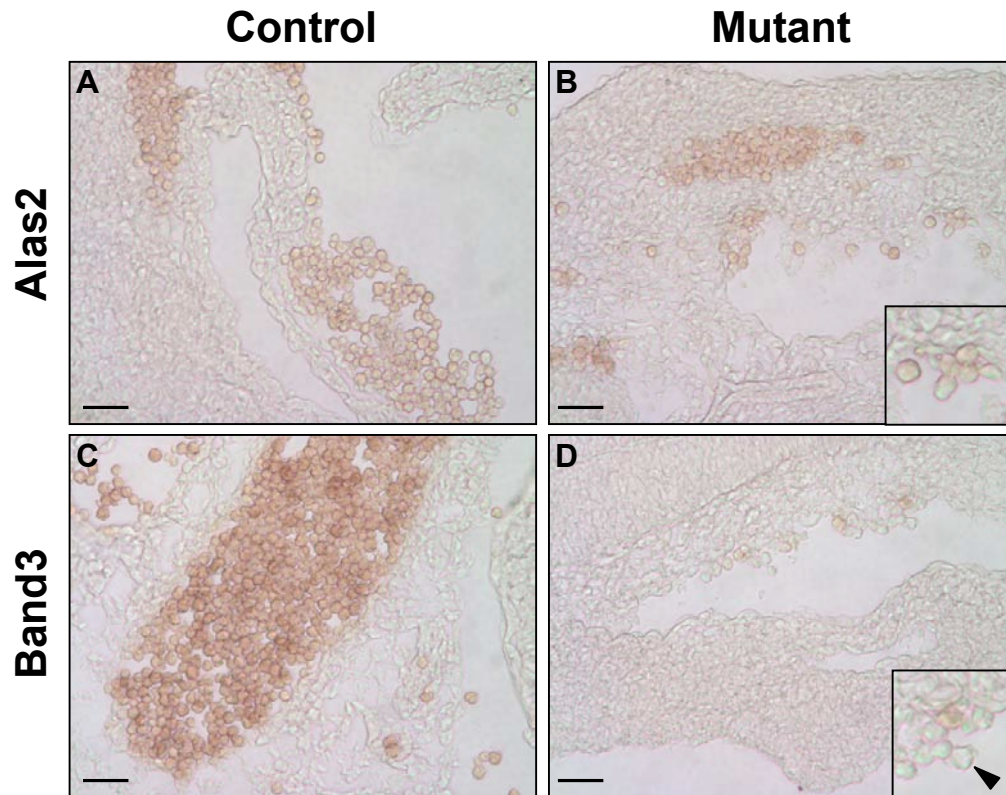

**Figure S2:** *Alas2* transcription is normal, but *Band3* transcription is abnormal in *Brg1<sup>fl/fl</sup>:Tie2-Cre<sup>+0</sup>* primitive erythrocytes. Cryosections from the same embryos depicted in Figure 5 (A-H) were subjected to in situ hybridization with probes against *Alas2* and *Band3*. Whereas *Alas2* transcripts were detected in almost all control and mutant primitive erythrocytes (A,B), mutant blood cells displayed a paucity of *Band3* transcripts (D). Comparable results were obtained from in situ hybridization experiments performed on multiple sections of one other control and one other mutant embryo. The arrowhead in the inset points to an embryonic blood cell with little or no detectable *Band3* transcription. Scale bar=40 $\mu$ m.
